# Supplementary material for: Novel garnished cobalt(ii) phthalocyanine with MWCNTs on modified GCE: sensitive and reliable electrochemical investigation of paracetamol and dopamine
Source: Royal Society of Chemistry journal article supplement (doi:10.1039/d0nj03926h), 2020-01-01
Supplement: d0nj03926h1.pdf [file d0nj03926h1.pdf]

Novel garnished phthalocyanine with MWCNTs on modified GCE: Sensitive and reliable electrochemical investigation of Paracetamol and Dopamine

\*Mounesh, K. R. Venugopal Reddy

\*Department of Studies and Research in Chemistry Vijayanagara Sri Krishnadevaraya  
University, Ballari– 583105 Karnataka (India)  
(E-mail: [mounesh.m.nayak@gmail.com](mailto:mounesh.m.nayak@gmail.com), Mob No: +91-8197546693)

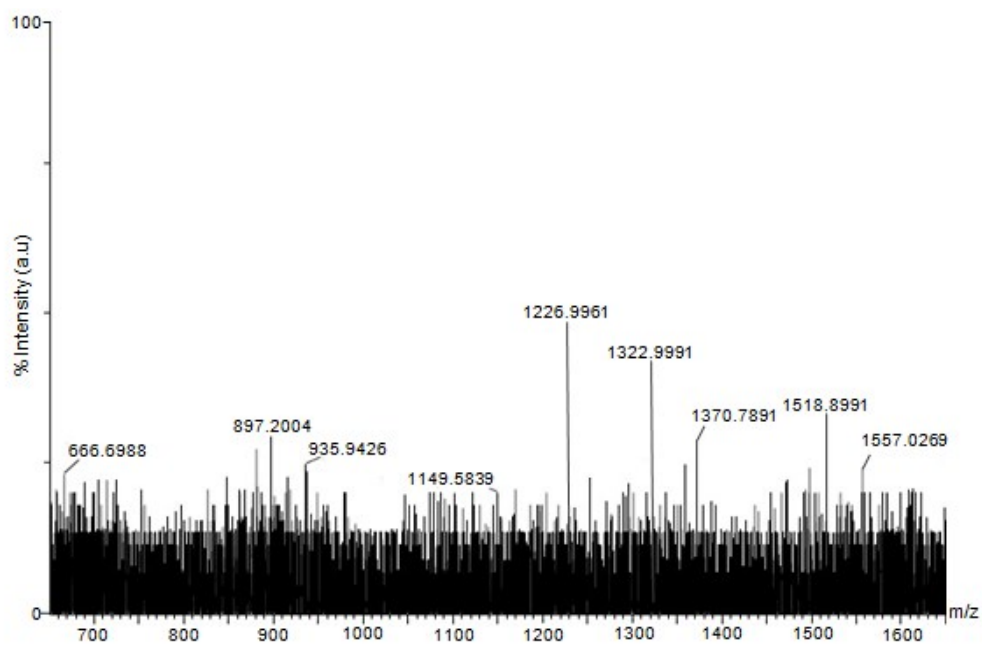

**Fig.S1:** Mass spectrum of CoTBPCAPc.

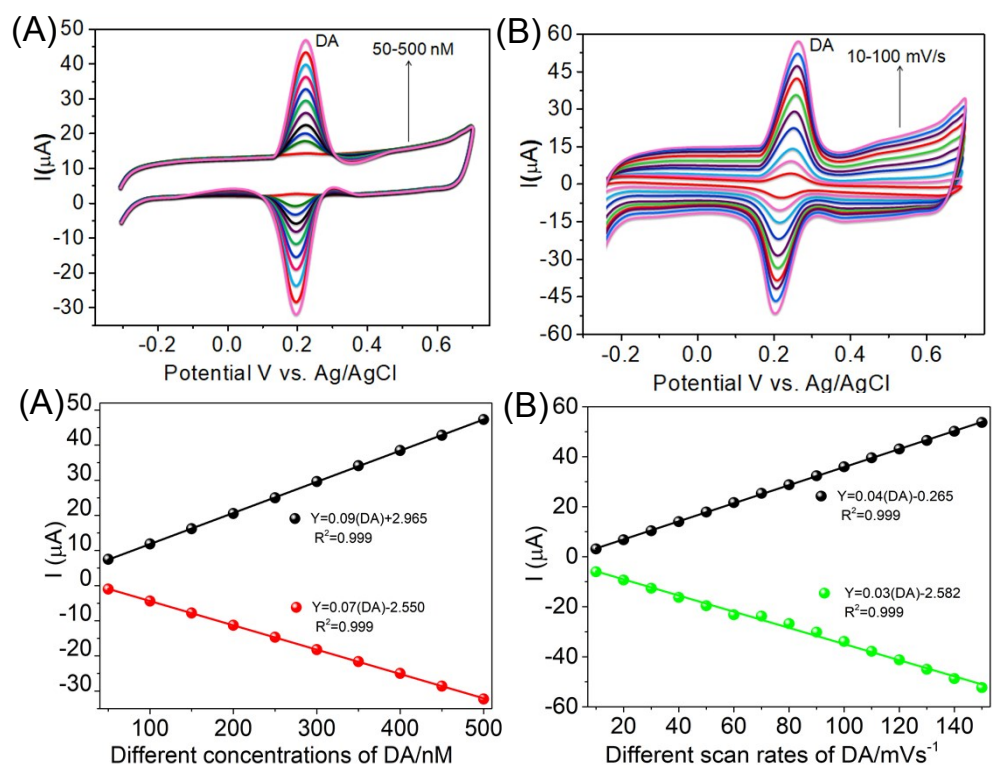

**Fig.S2:** Experimental CVs at peaks: (A) Different concentrations (50-500 nM) of DA, (B) different scan rates of DA by CoTBPCAPc/MWCNTs/GCE, (C, D) Linear plot of different concentration of DA and scan rates of DA vs. peak current in PBS (pH 7) electrolyte solution.

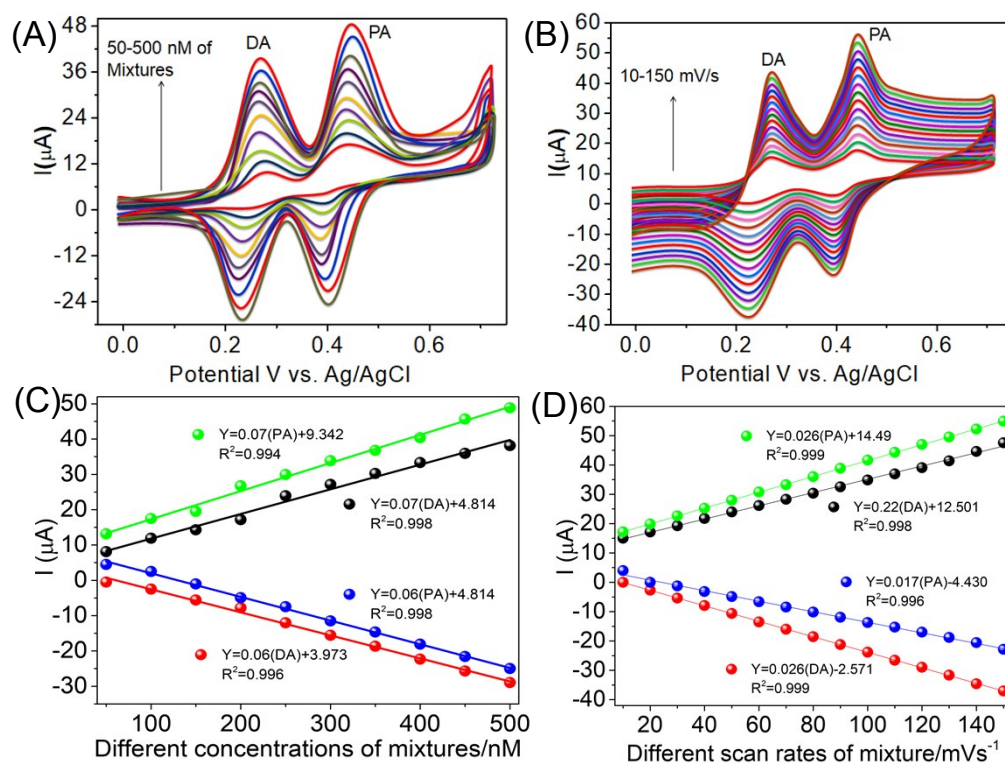

**Fig.S3:** Experimental CVs at peaks: (A) Different concentrations (50-500 nM) of DA + PA, (B) different scan rates of mixture by CoTBPCAPc/MWCNTs/GCE, (C, D) Linear plot of different concentration of mixture and scan rates of mixture vs. peak current in PBS (pH 7) electrolyte solution.

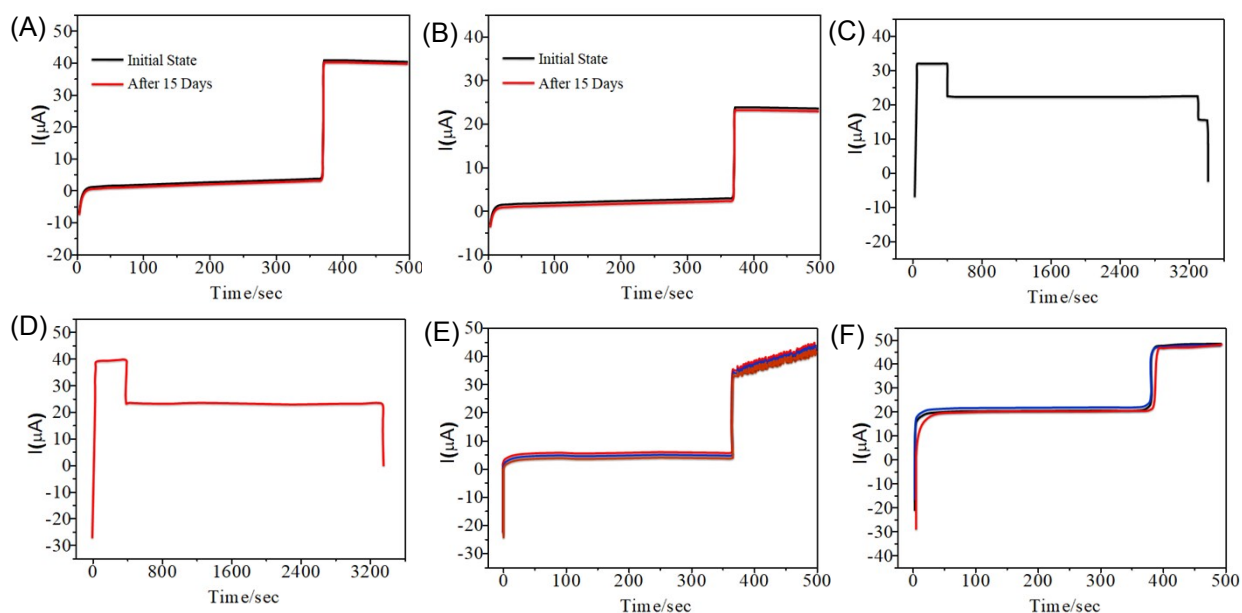

**Fig.S4:** Storage stability of the CoTBPCAPc/MWCNTs/GCE for the response to 100 nM DA (A) and 100 nM PA (B). (C, D) Operational stability of the CoTBPCAPc/MWCNTs/GCE under continuous response at the optimized potential of +200 mV and +400 mV in a stirred PBS (pH 7) containing 100 nM DA and PA. (E, F) Reproducibility of the CoTBPCAPc/MWCNTs/GCE at the potential of +200 and +400 mV in a stirred PBS (pH 7) for injections of 100 nM DA and PA.

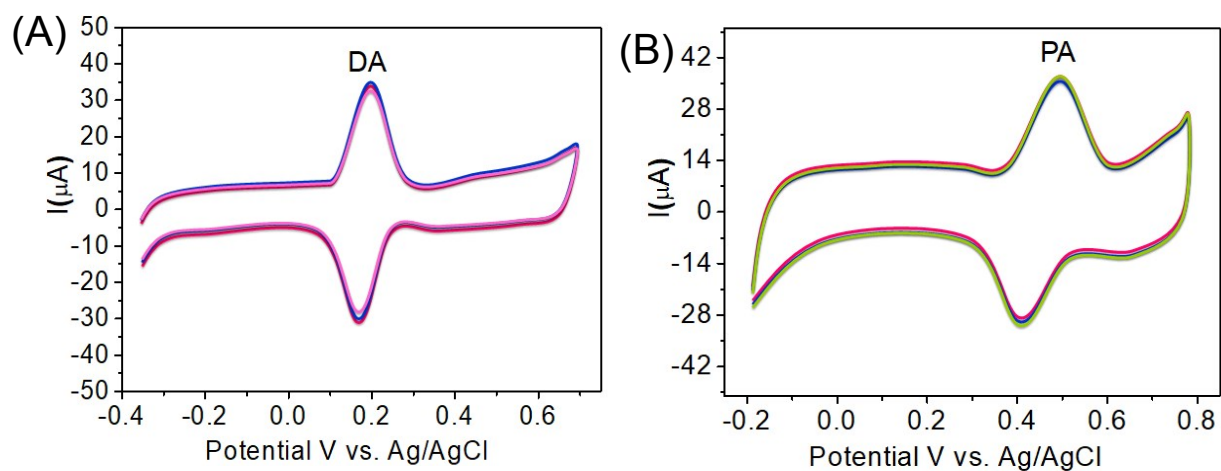

**Fig.S5:** Ten successive CVs 100 nM of (A) DA and (B) PA of CoTBPCAPc/MWCNTs/GCE in PBS (pH 7) solution at scan rate of  $0.10 \text{ V s}^{-1}$ .

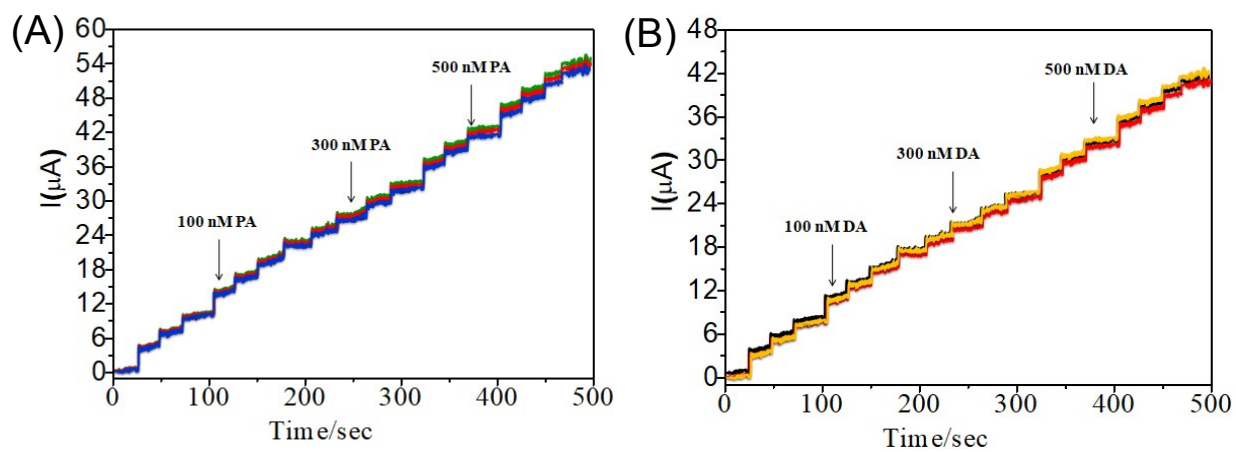

**Fig.S6:** Representative amperometric curves of three CoTBPCAPc/MWCNTs/GCE prepared on a same GCE in 5 mL stirring PBS (pH 7) solution with successive additions of 500 nM DA and PA at +200 mV and +400 mV (n=3).

**Table S1.** Determination of DA and PA in pharmaceutical samples.

| Quantitative analyses of DA and PA in the samples | Sample | Added (nmol L <sup>-1</sup> ) |     | Found (nmol L <sup>-1</sup> ) |        | Recovery (%) |        | RSD <sup>§</sup> (%) |      |
|---------------------------------------------------|--------|-------------------------------|-----|-------------------------------|--------|--------------|--------|----------------------|------|
|                                                   |        | DA                            | PA  | DA                            | PA     | DA           | PA     | DA                   | PA   |
| Dopamine hydrochloride injection                  | 1      | 100                           | -   | 100.4                         | -      | 100.3        | -      | 1.96                 | -    |
|                                                   | 2      | 200                           | -   | 200.3                         | -      | 102.2        | -      | 2.76                 | -    |
| Paracetamol tablet                                | 1      | -                             | 100 | -                             | 99.94  | -            | 99.93  | -                    | 4.95 |
|                                                   | 2      | -                             | 200 | -                             | 199.96 | -            | 199.96 | -                    | 2.25 |

1 and 2 spiked diluted pharmaceutical samples of DA and PA in PBS. § Relative standard deviation of three measured values.



**Table S2.** Determination of mixtures of DA and PA in urine samples at CoTBPCAPc/MWCNTs/GC electrode (n=3).

| Samples                                                     | <u>Added (nM)</u> |     |              | <u>Detected (nM)</u> |       |              | <u>Recovery (%)</u> |       |              | <u>RSD<sup>§</sup> (%)</u> |      |              |
|-------------------------------------------------------------|-------------------|-----|--------------|----------------------|-------|--------------|---------------------|-------|--------------|----------------------------|------|--------------|
|                                                             | DA                | PA  | Urine sample | DA                   | PA    | Urine sample | DA                  | PA    | Urine sample | DA                         | PA   | Urine sample |
| Dopamine hydrochloride injection (1.6 mg mL <sup>-1</sup> ) | -                 | -   | -            | 10.3                 | -     | -            | -                   | -     | -            | -                          | -    | -            |
| Paracetamol tablet (BP 500)                                 | -                 | -   | -            | -                    | 60.65 | -            | -                   | -     | -            | -                          | -    | -            |
| 1                                                           | 60                | 60  | -            | 70.5                 | 104.9 | -            | 100.3               | 99.9  | -            | 2.25                       | 1.58 | -            |
| 2                                                           | 100               | 85  | -            | 94.0                 | 130.2 | -            | 98.6                | 99.6  | -            | 4.25                       | 3.62 | -            |
| 3                                                           | 100               | 100 | -            | 109.1                | 160.5 | -            | 98.9                | 101.2 | -            | 3.45                       | 2.81 | -            |
| Urine samples                                               |                   |     |              |                      |       |              |                     |       |              |                            |      |              |
| 1                                                           | -                 | -   | 100          | -                    | -     | 103.3        | -                   | -     | 97.8         | -                          | -    | 4.28         |
| 2                                                           | -                 | -   | 150          | -                    | -     | 156.4        | -                   | -     | 104.3        | -                          | -    | 3.28         |
| 3                                                           | -                 | -   | 200          | -                    | -     | 205.6        | -                   | -     | 102.8        | -                          | -    | 2.87         |

1, 2 and 3 spiked diluted pharmaceutical samples of mixtures of DA and PA in urine. § Standard addition method.
